# Supplementary material
Source: Springer Nature journal article supplement (https://www.springermedizin.de/resource/supplementary/13020_2006_3_MOESM3_ESM.pdf/9640790)

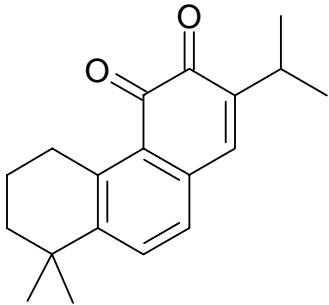

Miltirone

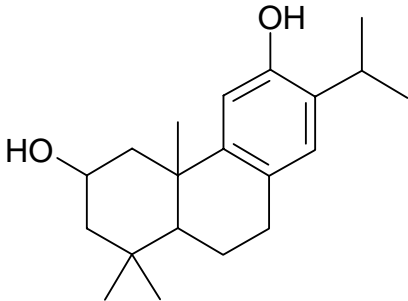

Salviol

Supplement: MOESM3 [file 9640790]
